# Supplementary material for: Toward Smart Biomimetic Apatite-Based Bone Scaffolds with Spatially Controlled Ion Substitutions
Source: MDPI journal article supplement (doi:10.3390/nano13030519), 2023-01-28
Supplement: s1 [file s1]

## Supporting Information

Edoardo Cianflone <sup>1,2</sup>, Fabien Brouillet <sup>2</sup>, David Grossin <sup>1</sup>, Jérémy Soulié <sup>1</sup>, Claudie Josse <sup>3</sup>, Sanjana Vig <sup>4,5</sup>, Maria Helena Fernandes <sup>4,5</sup>, Christophe Tenailleau <sup>2</sup>, Benjamin Duployer <sup>2</sup>, Carole Thouron <sup>1</sup> and Christophe Drouet <sup>1,\*</sup>

<sup>1</sup> CIRIMAT, Université de Toulouse, CNRS, INP-ENSIACET, 31030 Toulouse, France

<sup>2</sup> CIRIMAT, Université de Toulouse, CNRS, UT3 Paul Sabatier, 31062 Toulouse, France

<sup>3</sup> Centre de Microcaractérisation Raimond Castaing, Université de Toulouse, UPS, CNRS, INP, INSA, 31400 Toulouse, France

<sup>4</sup> Faculdade de Medicina Dentaria, Universidade do Porto, Rua Dr Manuel Pereira da Silva, 4200-393 Porto, Portugal

<sup>5</sup> LAQV/REQUIMTE, University of Porto, 4160-007 Porto, Portugal

\* Correspondence: christophe.drouet@cirimat.fr

### non-substituted biomimetic apatite (hap-6d, ref)

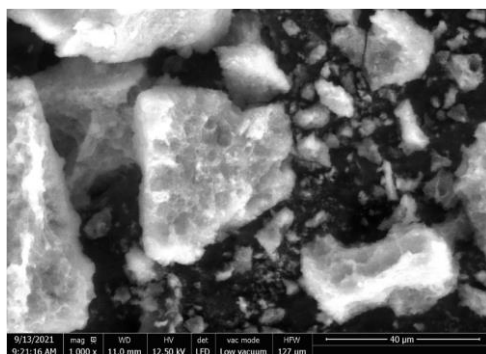

### hap-1d 10%Cu

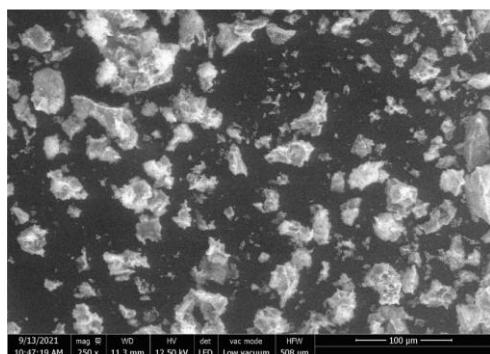

### hap-1d 15%Zn

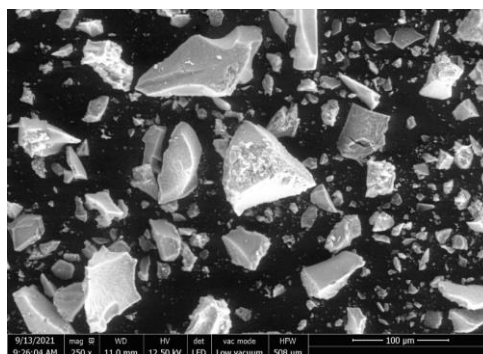

**Figure S1:** SEM observations of selected precipitated biomimetic apatite samples for reference (undoped) and single-ion doping.

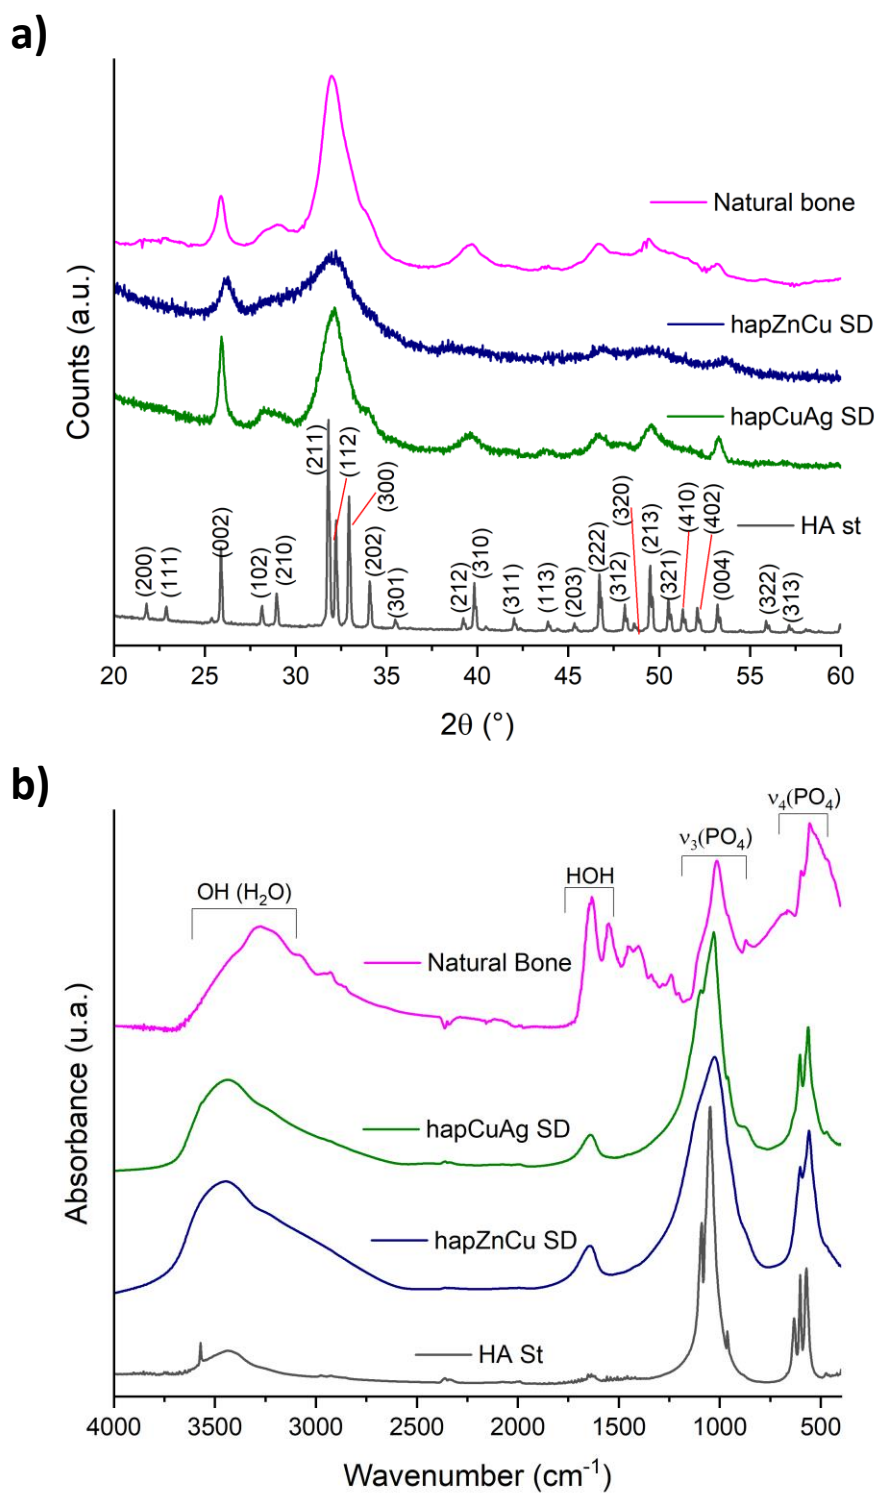

**Figure S2:** (a) XRD and (b) FTIR analyses on core-shell particles.

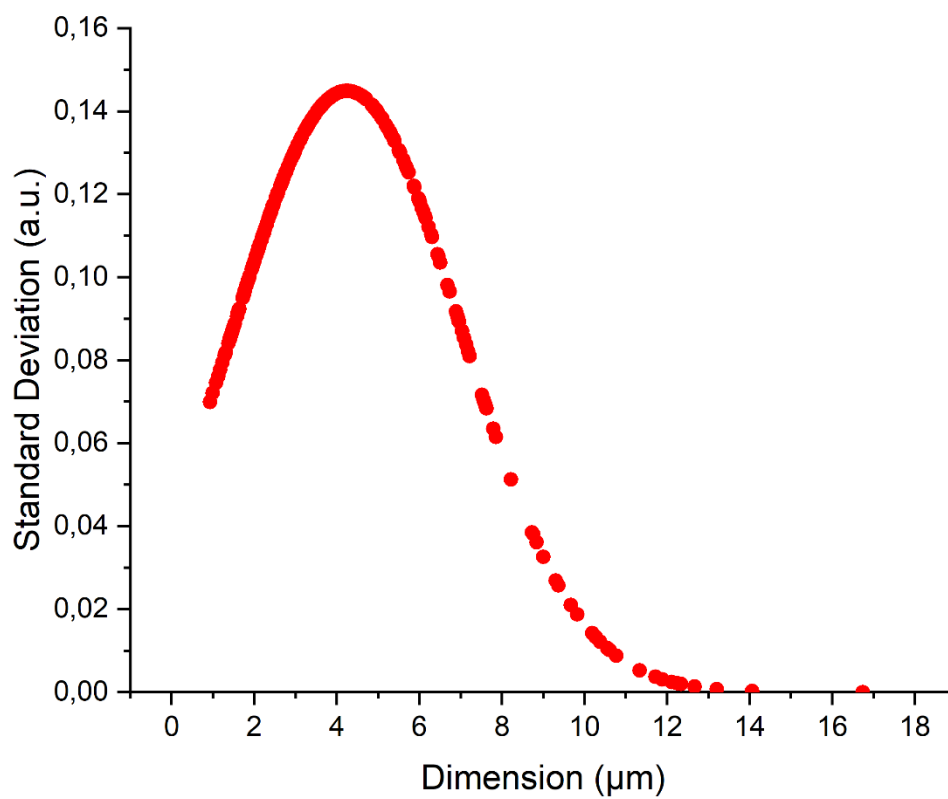

**Figure S3:** Particle size distribution spanning in the range 1.5-15  $\mu\text{m}$  with a (Gaussian) statistical mode, with a mean diameter to  $6.0 \pm 3.3 \mu\text{m}$ .

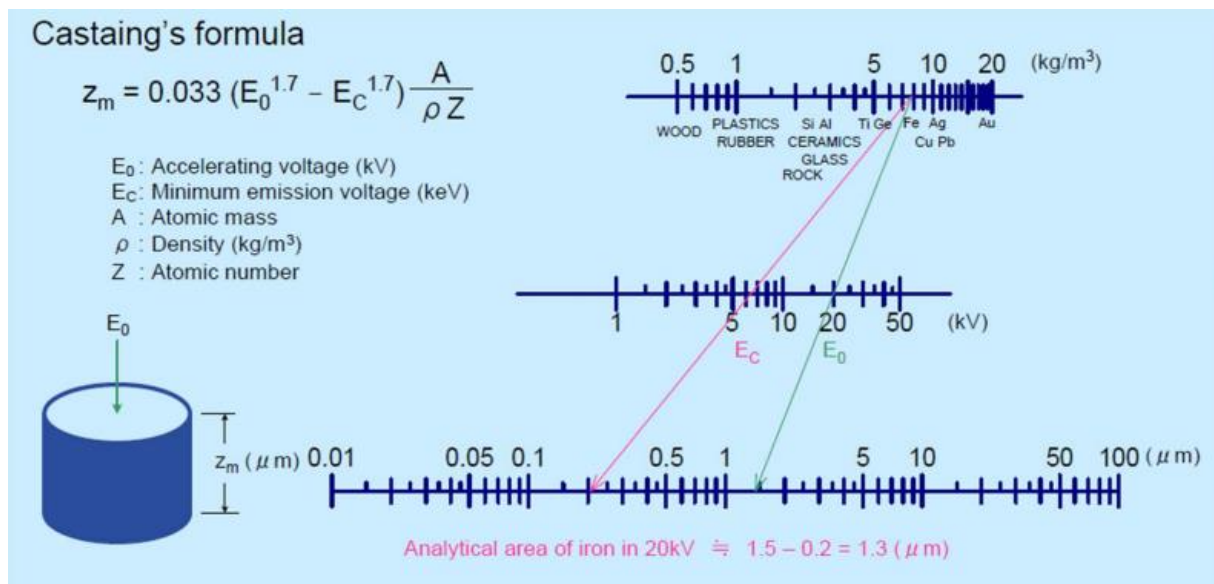

**Figure S4:** Castaing's formula.
